# Supplementary material for: Valorization of Onion Waste by Obtaining Extracts Rich in Phenolic Compounds and Feasibility of Its Therapeutic Use on Colon Cancer
Source: MDPI journal article supplement (doi:10.3390/antiox11040733), 2022-04-07
Supplement: s1 [file s1]

## Supplementary Material

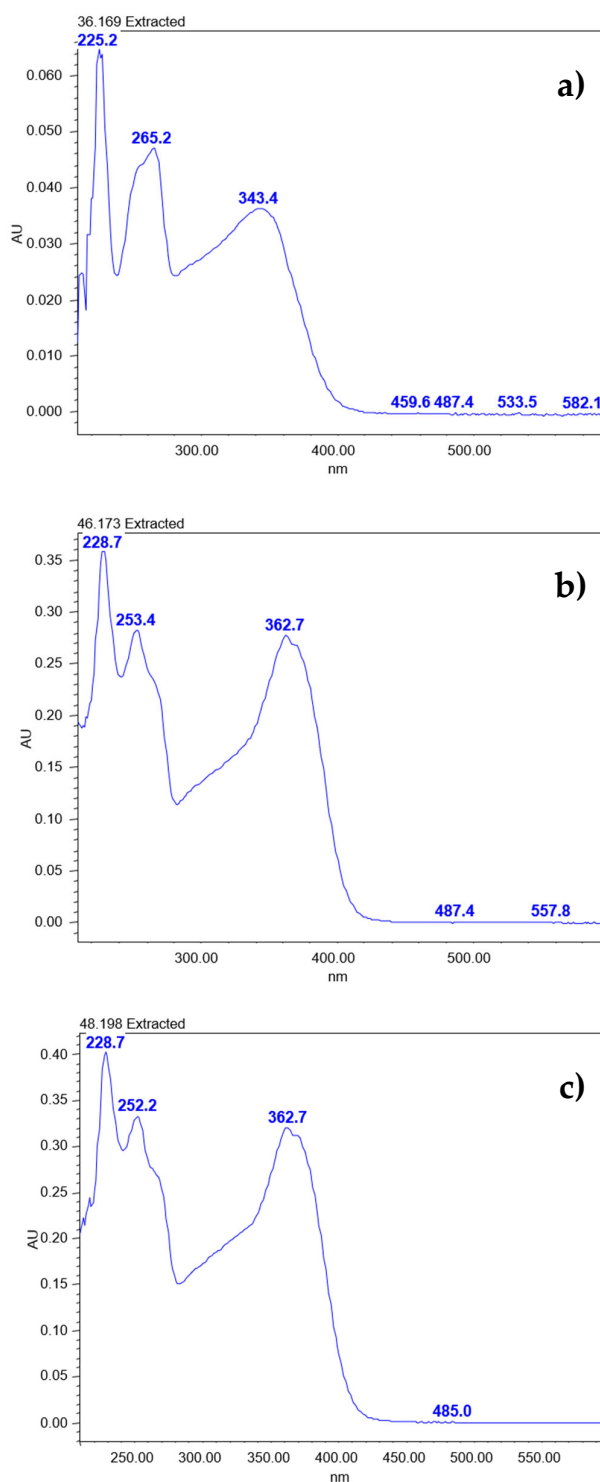

**Figure S1.** UV spectra of the unidentified peaks of different quercetin derivatives. The upper spectrum corresponds to peak 3 (a) and the other two spectra correspond to peaks 6 (b) and 7 (c), respectively.
